# Supplementary material
Source: MDPI journal article supplement (https://www.mdpi.com/2073-4344/9/5/484)
Supplement: s1 [file s1]

Archive with 3 entries (3 files):
- movie.zip
- 2019_05_24 - suppl_model.pdf
- catalysts-492711-sm-experiment-final.pdf
